19 **Abstract**

20 Ketamine is a multifunctional drug with clinical applications as an anesthetic, as a pain  
21 management medication and as a transformative fast-acting antidepressant. It is also abused as a  
22 recreational drug due to its dissociative property. Recent studies in rodents are revealing the  
23 neuronal mechanisms that mediate the complex actions of ketamine, however, its long-term impact  
24 due to prolonged exposure remains much less understood with profound scientific and clinical  
25 implications. Here, we develop and utilize a high-resolution whole-brain phenotyping approach to  
26 show that repeated ketamine administration leads to a dosage-dependent decrease of dopamine  
27 (DA) neurons in the behavior state-related midbrain regions and, conversely, an increase within  
28 the hypothalamus. Congruently, we show divergently altered innervations of prefrontal cortex,  
29 striatum, and sensory areas. Further, we present supporting data for the post-transcriptional  
30 regulation of ketamine-induced structural plasticity. Overall, through an unbiased whole-brain  
31 analysis, we reveal the divergent brain-wide impact of chronic ketamine exposure on the  
32 association and sensory pathways.

33

34 **Keywords:** Dopamine, Ketamine, Plasticity, Whole brain, neural circuit adaptations, modulation

## 35 INTRODUCTION

36 Ketamine is a schedule III (US Food and Drug Administration) substance with clinical  
37 applications as a dissociative anesthetic, as a pain management drug and, most recently, as a  
38 transformative fast-acting antidepressant<sup>1-6</sup>. Pharmacologically, ketamine is thought to act broadly  
39 in the brain<sup>7</sup>, most prominently as a non-competitive antagonist of the N-methyl-D-aspartate  
40 receptor (NMDAR)<sup>8,9</sup> but also as a blocker of hyperpolarization-activated cyclic nucleotide  
41 (HCN1)<sup>10,11</sup> channels and as a potential activator of opioid receptors<sup>12,13</sup>. Recent studies in rodent  
42 models are unraveling the cellular and neural circuit underpinnings of ketamine's complex action  
43 in the brain. For example, an antidepressant dose of ketamine was shown to promote spinogenesis  
44 and synaptogenesis in prefrontal cortical circuits to rescue the eliminated spines in a depression  
45 mouse model<sup>14</sup>. Another recent study showed that sub-hypnotic doses (50 and 100 mg/kg) of  
46 ketamine switches the spontaneous excitatory activity across the neocortex by suppressing the  
47 active neurons while activating the previously silent neurons, paralleling its dissociative  
48 property<sup>15</sup>. Acute ketamine administration also broadly impacts the dopaminergic modulatory  
49 system (via NMDAR antagonism<sup>16,17</sup>), resulting in increased firing in the ventral tegmental area  
50 (VTA) dopamine (DA) neurons and enhanced DA release in the frontal cortex, striatum and  
51 nucleus accumbens<sup>16-18</sup> (**Fig. 1a**).

52 In contrast, the long-term impact of chronic ketamine exposure on brain networks remains  
53 much less understood, with profound scientific and clinical implications<sup>19,20</sup>. The antidepressant  
54 effect of ketamine is known to be transient, especially in treatment-resistant depression patients,  
55 thus often requiring maintenance treatments over years<sup>19</sup>. Additionally, the long-term recreational  
56 abuse has been associated with cognitive and sensory impairments<sup>21-23</sup> and significant damages  
57 have been reported in the frontal, parietal, and occipital cortices in the brain<sup>24</sup>. Recent studies in  
58 mice have further revealed significant alterations in neocortical microcircuit synchrony after  
59 repeated exposure to ketamine<sup>25,26</sup>. Therefore, with its broad clinical importance and increasing  
60 long-term abuse potential at higher doses, there is a considerable interest in understanding the  
61 molecular, cellular, and neural circuit alterations caused by long-term exposure to ketamine over  
62 a wide range of doses<sup>19,20</sup>.

63 We sought to systematically investigate the brain-wide impact of chronic (*R,S*)-ketamine  
64 exposure on the entire dopaminergic system in mice. By utilizing a range of sub-hypnotic<sup>15</sup> doses

65 (30 and 100 mg/kg) and high-resolution whole-brain phenotyping of DA neurons, we show that  
66 chronic ketamine exposure over time results in divergent brain-wide changes in the DA neuron  
67 populations and their long-range projections to the prefrontal cortex and sensory areas. Further,  
68 we reveal the role of post-transcriptional regulation mechanisms in modulating the ketamine-  
69 induced structural plasticity in the DA system. Overall, through an unbiased whole-brain high-  
70 resolution mapping, we reveal the broad non-monotonic impact of ketamine on the brain-wide DA  
71 modulatory system.

## 72 RESULTS

### 73 High-resolution whole-brain phenotyping of ketamine-treated animals

74 We established a complete pipeline for whole-brain labeling, high-resolution imaging and  
75 comparative phenotyping of the entire dopaminergic modulatory system after 1, 5 and 10 days of  
76 daily (*R,S*)-ketamine (30 and 100 mg/kg) and saline control intraperitoneal (i.p.) injections (**Fig.**  
77 **2**). The cellular toxicity of the ketamine exposure was assessed by  $\alpha$ -activated caspase antibody  
78 staining after 10 days of 100 mg/kg daily i.p. injections, revealing no significant cell death in the  
79 brain (**Supplementary Fig. 1**). The locomotion of injected animals was video-recorded and  
80 quantified at 15' and 60' post injections (**Supplementary Fig. 2**). The 30 mg/kg group, but not  
81 100 mg/kg, exhibited increasing (with days of exposure) locomotion sensitivity 15'-post injection.

82 The extracted intact brains were stained with  $\alpha$ -tyrosine hydroxylase (TH; rate-limiting  
83 enzyme for DA synthesis), which is a widely used marker of DA neurons<sup>27</sup> (**Fig. 2,**  
84 **Supplementary Video 1**). Note that even though DA may further get converted to other  
85 catecholamines (norepinephrine and/or epinephrine) in the downstream pathways, the distribution  
86 of these noradrenergic neurons is very well characterized and known to be localized within the  
87 hindbrain regions (pons and medulla)<sup>28,29</sup>. Nevertheless, due to their brain-wide projections (e.g.,  
88 to cerebral cortex, hippocampus, amygdala and hypothalamus), the precise identity of the TH+  
89 neuronal projections (as DA or noradrenergic) may only be inferred as catecholaminergic<sup>28,29</sup>.

90 For investigating the TH mRNA expression, we established and used a whole-brain  
91 staining method based on hybridization chain reaction<sup>30,31</sup>, and also utilized a well-characterized  
92 inducible Cre line, TH-CreER<sup>32</sup>, crossed with a tdTomato reporter line (**Supplementary Fig. 3**).  
93 The intact brain samples were cleared with either iDISCO<sup>+33</sup> or passive CLARITY<sup>34</sup> methods, and  
94 imaged at high-resolution with COLM<sup>34</sup> or light sheet theta microscopy (LSTM<sup>35</sup>) (**Fig. 2**).



95 Finally, we developed a set of accurate large data analysis methods (suiteWB, **Fig. 2b**) for  
96 high-resolution phenotyping of the entire dopaminergic system – both at the levels of TH+ cell  
97 bodies as well as TH+ brain-wide projections (**Fig. 2b**). To this end, we first generated a local  
98 average reference (from 7 brains), which was annotated by the registration of Allen brain atlas  
99 (ABA, *ccfv3*<sup>36</sup>) annotations. In addition, we developed a multi-model image segmentation  
100 approach to accurately detect the TH+ cell bodies and their brain-wide projections (**Fig. 2b**,  
101 **Supplementary Video 3**). ANOVA and two-sided Mann Whitney U tests with Bonferroni  
102 correction were utilized for statistical comparisons. Overall, suiteWB methods allow accurate  
103 high-resolution phenotyping of the brain-wide structural plasticity.

### 104 **Dosage-dependent divergent impact of chronic ketamine exposure on the DA domains**

105 We generated high-resolution whole-brain maps of TH+ neurons after 1, 5, and 10 days of  
106 daily ketamine and saline i.p. injections (**Fig. 3, Supplementary Video 3**). Using suiteWB, TH+  
107 neuron counts were calculated across all the brain regions (**Fig. 3a**) and were statistically compared  
108 across treatment groups at multiple scales by utilizing different graph-cut levels of the hierarchical  
109 ABA annotation tree. Robust, statistically significant alterations were only detected after 10 days  
110 of ketamine exposure for both 30 and 100 mg/kg ketamine treatment groups, therefore, 1- and 5-  
111 days treatment datasets were not analyzed further. In addition, as expected, 100 mg/kg treatment  
112 group exhibited much more changes than the 30 mg/kg treatment group (**Fig. 3**).

113 At a higher-level annotation (i.e., larger brain regions ROIs; level 6), we found an overall  
114 dose-dependent statistically significant decrease in TH+ neuron counts within the behavior-state  
115 related mid-brain regions (MBsta) and, conversely, an overall increase within the hypothalamic  
116 lateral zone (LZ) in both the 30 and 100 mg/kg (10 days) treatment groups (**Fig. 3a**). In addition,  
117 for the 100 mg/kg group, we observed a tendency for increase within the hypothalamic  
118 periventricular zone (PVZ) and, for the 30 mg/kg group, significant decrease within the  
119 periventricular region (PVR) (**Fig. 3a**). Next, we compared the brains at lower-level (level 8) graph  
120 cut of the ABA annotation tree. For both 30 and 100 mg/kg treatment groups, we observed a robust  
121 decrease in the dorsal raphe (DR<sup>37</sup>) and increase in the lateral hypothalamic region zona incerta  
122 (ZI<sup>38</sup>). In addition, in the 100 mg/kg treatment group, we observed a robust decrease in the reticular  
123 nucleus retrorubral area (RR<sup>39</sup>) and increases in the arcuate hypothalamic nucleus (ARH<sup>40</sup>), the  
124 periventricular hypothalamic nucleus posterior part (PVp), tuberomammillary nucleus (TM) and

125 the periventricular hypothalamic nucleus descending division (PVHd) (**Fig. 3a**). Whereas, in the  
126 30 mg/kg treatment group, we found significant increases in mid-brain region SNr (Substantia  
127 nigra reticular part) and a significant decrease in the dorsomedial nucleus of the hypothalamus  
128 (DMH) and the medial hypothalamic region MPN<sup>41</sup> (preoptic nucleus). These brain-wide  
129 alterations were further validated by an independent voxels-based (20x20x20  $\mu\text{m}^3$  sampling) brain  
130 parcellation approach (**Fig. 3b**). Representative example volume renderings are shown for RR,  
131 DR, ARH, PVp and PVHd (**Fig. 3c**, 100 mg/kg ketamine-treated group).

132 Overall, an unbiased whole-brain comparison of TH<sup>+</sup> neuron counts revealed divergent  
133 and dosage-dependent brain-wide impact of chronic ketamine exposure (**Fig. 1**) - increases within  
134 multiple hypothalamic domains (e.g., ARH, containing TH<sup>+</sup> DA neurons with orexigenic function  
135 in energy homeostasis<sup>40</sup>) and decreases within the behavioral state related midbrain regions (e.g.,  
136 DR, containing TH<sup>+</sup> DA neuron which modulate the social isolation behaviors<sup>37</sup>; RR, containing  
137 TH<sup>+</sup> DA neurons with role in fear and aversive signaling<sup>39</sup>).

### 138 **Untranslated TH mRNA<sup>+</sup> neurons facilitate ketamine-induced cellular plasticity**

139 We sought to further investigate the mechanistic basis of the chronic ketamine-induced  
140 brain-wide cellular plasticity. Utilizing our whole-brain mRNA labeling protocol, we first mapped  
141 the expression of TH mRNA (**Fig. 4a, Supplementary Video 4**), revealing a much broader  
142 distribution than the corresponding TH protein. Such discrepancy in the TH mRNA/protein  
143 expression (**Supplementary Video 5**) suggests a potential role for post-transcriptional  
144 mechanisms in rapid modulation of the brain-wide DA system. To test this hypothesis further, we  
145 utilized a well-characterized inducible TH-CreER transgenic line<sup>32</sup> (**Supplementary Fig. 2**),  
146 crossed with a tdTomato reporter line, to investigate if the newly acquired TH<sup>+</sup> neurons originated  
147 from the untranslated TH mRNA<sup>+</sup> neurons. TH-CreER induction (by 4-OHT i.p. injections) was  
148 performed 1-week prior to the start of the ketamine exposure, thus, permanently labeling the pre-  
149 treatment TH mRNA<sup>+</sup> neurons by tdTomato. After 10 days of chronic ketamine (100 mg/kg)  
150 exposure, the brains were harvested, cleared with passive CLARITY<sup>34</sup>, and labeled with  $\alpha$ -TH  
151 antibody for a direct comparison of the after-treatment TH<sup>+</sup> neurons with before-treatment TH  
152 mRNA<sup>+</sup> neurons, within the exact same brain samples. As shown in **Fig. 4b**, we found a significant  
153 increase in TH protein<sup>+</sup>/tdTomato<sup>+</sup> co-labeled neurons ( $\alpha$ -TH  $\cap$  tdTomato) in the ketamine-  
154 treated group (compared to saline controls), while the overall number of tdTomato<sup>+</sup> neurons

155 remained unchanged, consistent with unchanged TH mRNA<sup>+</sup> neurons (**Fig. 4b**). Conversely, we  
156 observed a decrease in TH protein<sup>+</sup>/tdTomato<sup>+</sup> co-labeled neurons in the midbrain regions (which  
157 showed reduction in TH<sup>+</sup> DA neuron counts), while the tdTomato<sup>+</sup> and TH mRNA<sup>+</sup> neuron  
158 counts remain unchanged compared to the saline controls (**Fig. 4c**). Altogether, these results  
159 suggest that the cellular plasticity in the dopaminergic system may be facilitated by the existence  
160 of a much larger pools of untranslated TH mRNA<sup>+</sup> neurons to rapidly modulate the number of  
161 available TH<sup>+</sup> DA neurons in various regions of the brain.

## 162 **Altered long-range TH<sup>+</sup> projections after chronic ketamine exposure**

163 Taking advantage of the high-resolution of our datasets, we sought to map the brain-wide  
164 changes in TH<sup>+</sup> neuronal projections. Note that TH<sup>+</sup> neuronal projections may be DA or  
165 noradrenergic, therefore they can only be inferred as catecholaminergic<sup>28,29</sup>. Using the suiteWB  
166 pipeline, we estimated the projection densities in the ketamine (100 mg/kg, 10 days) treated and  
167 saline control whole-brain datasets and performed a voxel-by-voxel (at 25x25x25  $\mu\text{m}^3$  sampling)  
168 statistical comparisons across groups. As shown in **Fig. 5, Supplementary Video 6**, chronic  
169 ketamine exposure resulted in robust brain-wide changes in TH<sup>+</sup> projections. We observed  
170 increased densities in multiple associative cortical regions including the prefrontal cortex (PFC)-  
171 related prelimbic area (PL, **Supplementary Video 7, Fig. 5c**), orbital area (ORB, **Supplementary**  
172 **Video 8, Fig. 5c**), frontal pole (FRP, **Fig. 5a**) and anterior cingulate area (ACA, **Fig. 5a**), and  
173 posterior parietal association area (PTLp, **Fig. 5a**). Further, the lateral amygdala (LA,  
174 **Supplementary Video 9, Fig. 5c**), which is crucial for processing of threatening stimuli and fear  
175 behavior, specific regions of the lateral septal complex (septofimbrial nucleus (SF), involved in  
176 reward and reinforcement) and the triangular nucleus of septum (TRS) also showed increased  
177 projection densities (**Fig. 5a**). Furthermore, brain regions receiving olfactory inputs, including the  
178 taenia tecta (TT) and piriform area (PIR), and regions of the thalamus (lateral posterior nucleus of  
179 the thalamus (LP)) and hypothalamus (VMH and TU) also showed increases in the TH<sup>+</sup> neuronal  
180 innervations.

181 In contrast, the dorsal auditory area (AUDd, **Fig. 5d, Supplementary Video 10**), postero-  
182 lateral visual area (VISpl, **Fig. 5d, Supplementary Video 11**), entorhinal area (ENT) and  
183 presubiculum (PRE, involved in spatial information processing; **Fig. 5a**) exhibited decreased TH<sup>+</sup>  
184 projection densities. Striatum sub-regions caudoputamen (Cp) and bed nuclei of the stria terminalis

185 (BST/BNST, **Fig. 5d, Supplementary Video 12**) showed reductions consistent with the loss of  
186 TH+ neurons in DR, RR and SNc (**Fig. 3**). Finally, thalamic regions subparafascicular area (SPA)  
187 and subparafascicular nucleus (SPF), and midbrain regions nucleus sagulum (SAG) and  
188 pedunclopontine nucleus (PPN) also showed decreased projections.

189 Overall, consistent with the divergent changes in TH+ neuron counts in the midbrain and  
190 hypothalamic dopaminergic domains (**Fig. 3**), chronic ketamine exposure resulted in increased  
191 TH+ neuronal projection densities in the associative brain centers, including PFC-related regions,  
192 and decreased innervations of visual, auditory, and spatial information processing regions (**Fig. 5**).

## 193 **DISCUSSION**

194 Utilizing an unbiased, high-resolution whole-brain mapping approach, we revealed  
195 hitherto unknown divergence in the adaptability of the DA system to repeated ketamine exposure  
196 (summarized in **Fig. 1b**) – reduced number of TH+ neurons within the behavior state-related mid-  
197 brain domains and increased within the hypothalamic domains, along with altered long-range  
198 innervation of the association and sensory areas by TH+ neuronal projections. Such structural  
199 plasticity of brain-wide modulatory system may facilitate significant reconfiguration of the  
200 neuronal networks in response to external stresses such as ketamine exposure or diseased  
201 conditions (e.g., schizophrenia), to eventually result in long-lasting cognitive behavioral changes.  
202 Note that, DA may further get processed in the noradrenergic neurons, but their cellular  
203 distribution is well known to be restricted to specific domains in hindbrain regions<sup>28,29</sup>. However,  
204 the TH+ neuronal projections may still not be precisely identified as DA or noradrenergic by TH  
205 immunolabeling<sup>28,29</sup>. In addition, the loss of TH protein in DA neurons may not result in a  
206 permanent loss of DA neurons, nevertheless, it does indicate the loss of DA producing capacity  
207 due to the required role of TH in the L-DOPA (DA precursor) biosynthesis.

208 We also show that the adaptability of the DA system is facilitated by a large pool of neurons  
209 that stably maintain translationally suppressed TH mRNA (**Fig. 4**). These findings were validated  
210 by a direct comparison of the newly recruited or lost TH+ DA neurons with the before-exposure  
211 TH mRNA expressing neuron populations by utilizing an inducible TH-CreER transgenic mice  
212 line (**Fig. 4**). Mechanistically, these observed changes in DA system may, in part, be the result of  
213 repeated ketamine-induced activation/deactivation (indirect, via NMDAR antagonism) of the DA  
214 neurons due to the heterogeneous neuronal inputs. Intriguingly, the ketamine-induced cellular

215 plasticity is distinct from the previously reported neurotransmitter phenotypic plasticity of the  
216 hypothalamic DA neurons after changed day/night durations in rodents, and included loss of TH  
217 mRNA expression<sup>42</sup>. Overall, our data suggest that the maintenance of translationally suppressed  
218 mRNA, even though energetically costly process, may allow for faster brain-wide adaptations to  
219 various external stresses.

220 The development and use of unbiased, high-resolution whole-brain phenotyping of the  
221 entire DA system allowed discovery of the divergent impact of chronic ketamine exposure. Such  
222 non-monolithic brain-wide impact further underscores the need for unbiased investigations of  
223 on/off-target effects of ketamine treatment at a range of doses, as well as the urgency to develop  
224 targeted pharmacological intervention approaches (e.g., focused ultra sound-based  
225 approaches<sup>43,44</sup>) for treatment of complex brain disorders.

226

## 227 **Acknowledgements**

228 We are grateful to Jordan Hamm for critically reading the manuscript, and to Christine Denny, Rae  
229 Silver and Darcy Kelley for advice throughout the project. We thank Vivek Kumar for advice on  
230 the HCR probe design and general discussions. We are grateful to Briana Chen and Christine  
231 Denny for helping with the ANY-maze software. This work was supported by NIH grant  
232 DP2MH119423 and Columbia University Arts & Sciences startup grant to R.T.

233

## 234 **Author Contributions**

235 M.S.D., Y.C. and R.T. conceptualized and designed the project. M.S.D. performed most of the  
236 experiments. J.Z. performed mRNA staining experiments. E.D.D. contributed with animal  
237 husbandry and general experimental support. S.C. contributed to all the imaging experiments, and  
238 C.G. contributed to ClearScope imaging. Y.C. and R.T. developed the data analysis framework  
239 and code, and with M.S.D. analyzed the data. R.T., M.S.D. and Y.C. wrote the paper with inputs  
240 from all authors. R.T. supervised the project.

241

## 242 **Data availability statement**

243 All datasets will be made available on request.

244

245 **Code availability**

246 All code will be made available publicly as a GitHub repository.

247

248 **Declaration of interests**

249 The authors declare no competing interests.

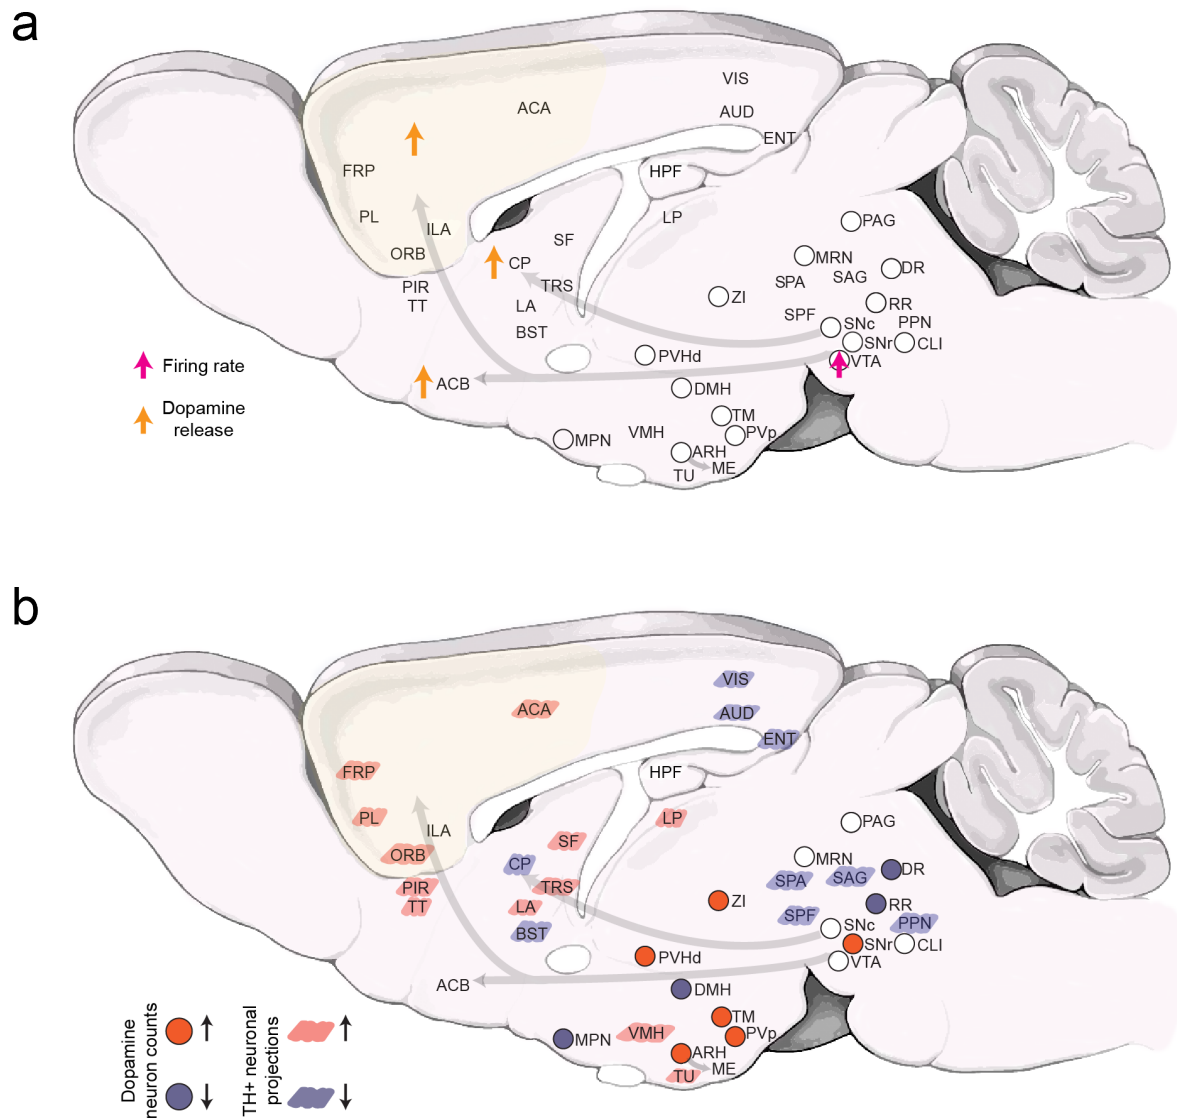

250

251 **Figure 1. Brain-wide impact of ketamine exposure on the dopaminergic modulatory system.**

252 (a) Schematic summary of currently known alterations in dopaminergic neuronal activity and

253 dopamine release after ketamine exposure<sup>16,17</sup>. (b) Schematic summary (this study) of the brain-

254 wide alterations in the DA system after 10 days of repeated ketamine (30 and 100 mg/kg) exposure.

255 Up and down arrows indicate increase and decrease, respectively. Note that, for the 30 mg/kg

256 ketamine treatment, statistically significant decreases in TH+ neuron counts were only observed

257 in DR, DMH and MPN, and increase in ZI. The TH+ neuronal projections changes are only shown

258 for the 100 mg/kg (10 days) treatment. Abbreviations used are standard Allen Brain Atlas terms,



259 as follows. ACA: anterior cingulate area; ACB: nucleus accumbens; ARH: arcuate hypothalamic  
260 nucleus; AUD: auditory areas; BST: bed nuclei of the stria terminalis; CLI: central linear nucleus  
261 raphe; CP: caudoputamen; DMH: dorsomedial nucleus of the hypothalamus; DR: dorsal nucleus  
262 raphe; ENT: entorhinal area; FRP: frontal pole, cerebral cortex; HPF: hippocampal formation; IF:  
263 interfascicular nucleus raphe; ILA: infralimbic area; LA: lateral amygdalar nucleus; LP: lateral  
264 posterior nucleus of the thalamus; MPN: medial preoptic nucleus; MRN: midbrain reticular  
265 nucleus; ORB: orbital area; PAG: periaqueductal gray; PIR: piriform area; PL: prelimbic area;  
266 PPN: pedunculo pontine nucleus; PVH: paraventricular hypothalamic nucleus; PVp:  
267 paraventricular hypothalamic nucleus, posterior part; RR: midbrain reticular nucleus, retrorubral  
268 area; SAG: nucleus sagulum; SF: septofimbrial nucleus; SNc: substantia nigra, compact part; SPA:  
269 subparafascicular area; SPF: subparafascicular nucleus; TM: tuberomammillary nucleus; TRS:  
270 triangular nucleus of septum; TT: taenia tecta; TU: tuberal nucleus; VIS: visual areas; VMH:  
271 ventromedial hypothalamic nucleus; VTA: ventral tegmental area; ZI: zona incerta.



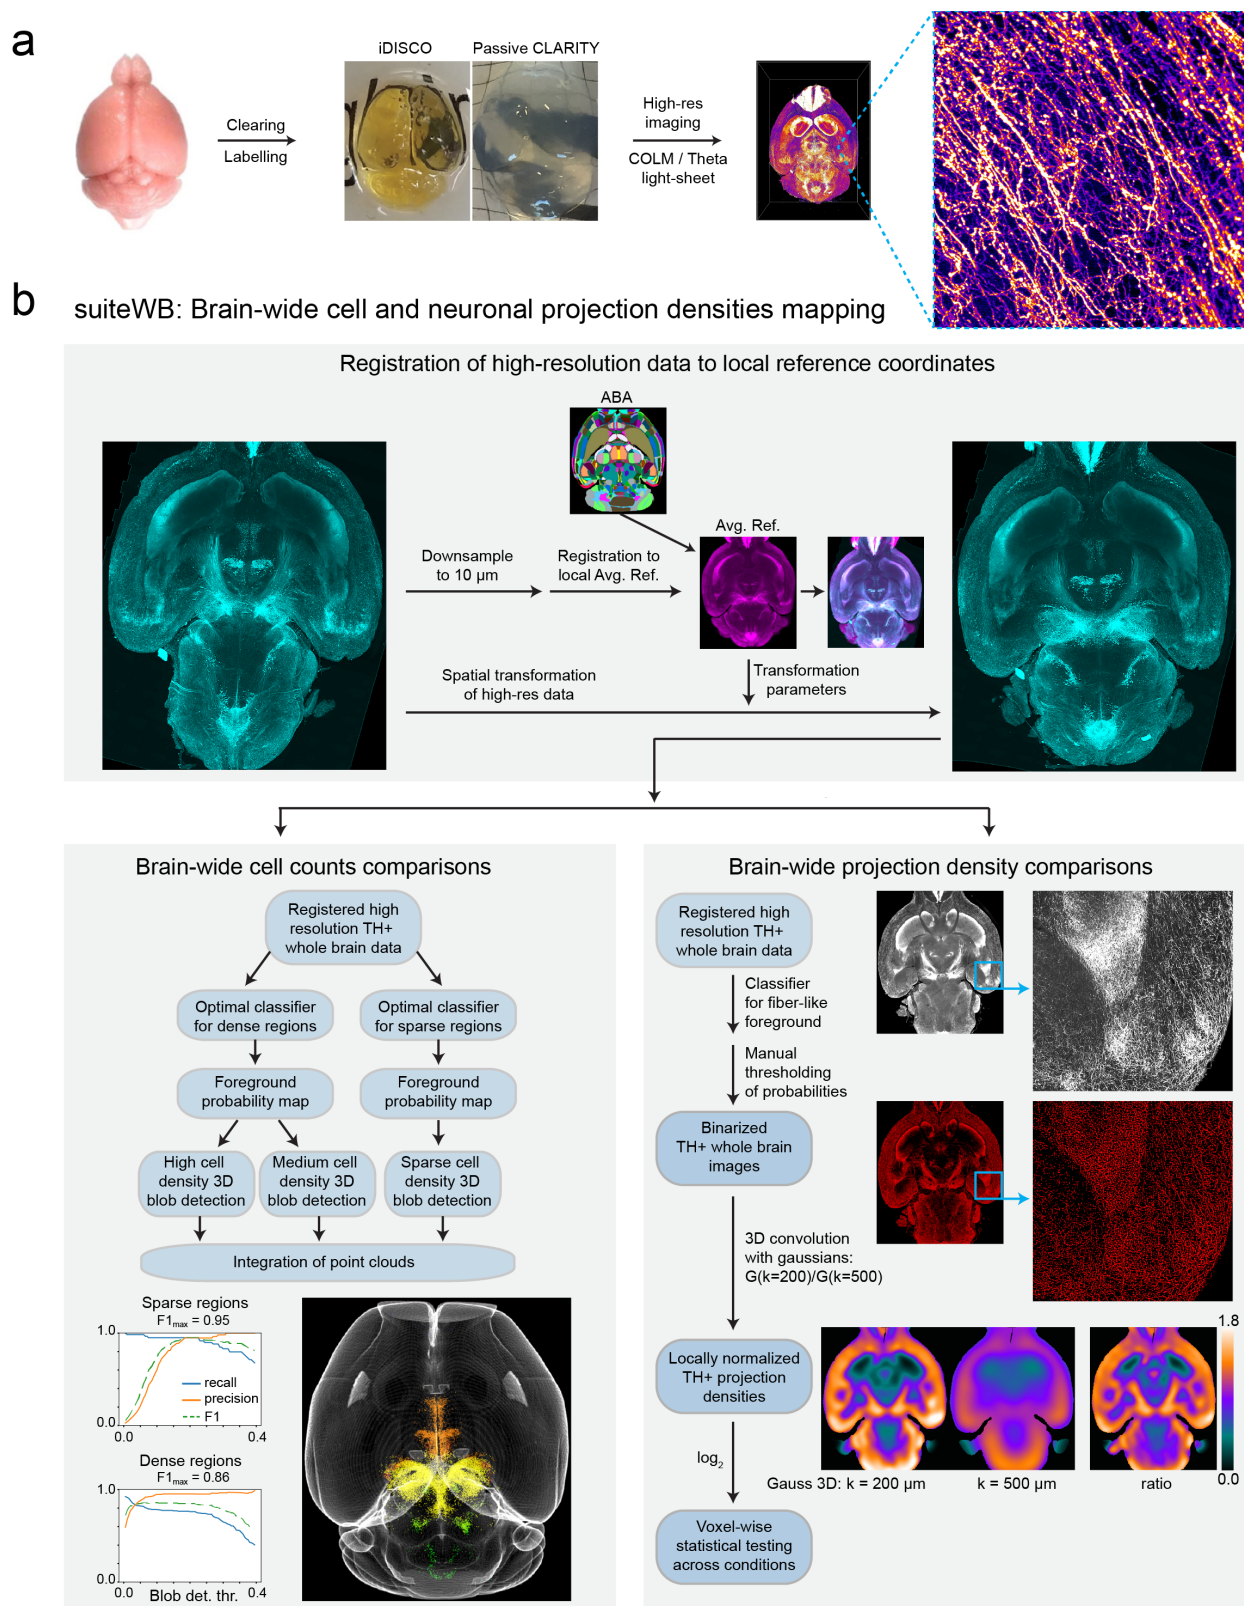

275 staining and/or TH-CreER x tdTomato signal), clearing (iDISCO+ or passive CLARITY) and  
276 high-resolution imaging with COLM or LSTM light sheet microscopy. (b) A suite of tools  
277 (suiteWB) for high-resolution comparative phenotyping of neuron counts and their brain-wide  
278 projection, including registration of high-resolution whole-brain images to a local average  
279 reference brain (with mapped ABA reference annotations), accurate brain-wide multi-model cell  
280 segmentation approach and neuronal projections density estimation. F1 for sparse and dense region  
281 segmentations achieved are 0.95 and 0.86, respectively. Also see **Supplementary Videos 1-4** for  
282 volume renderings of the raw data and segmentation results.

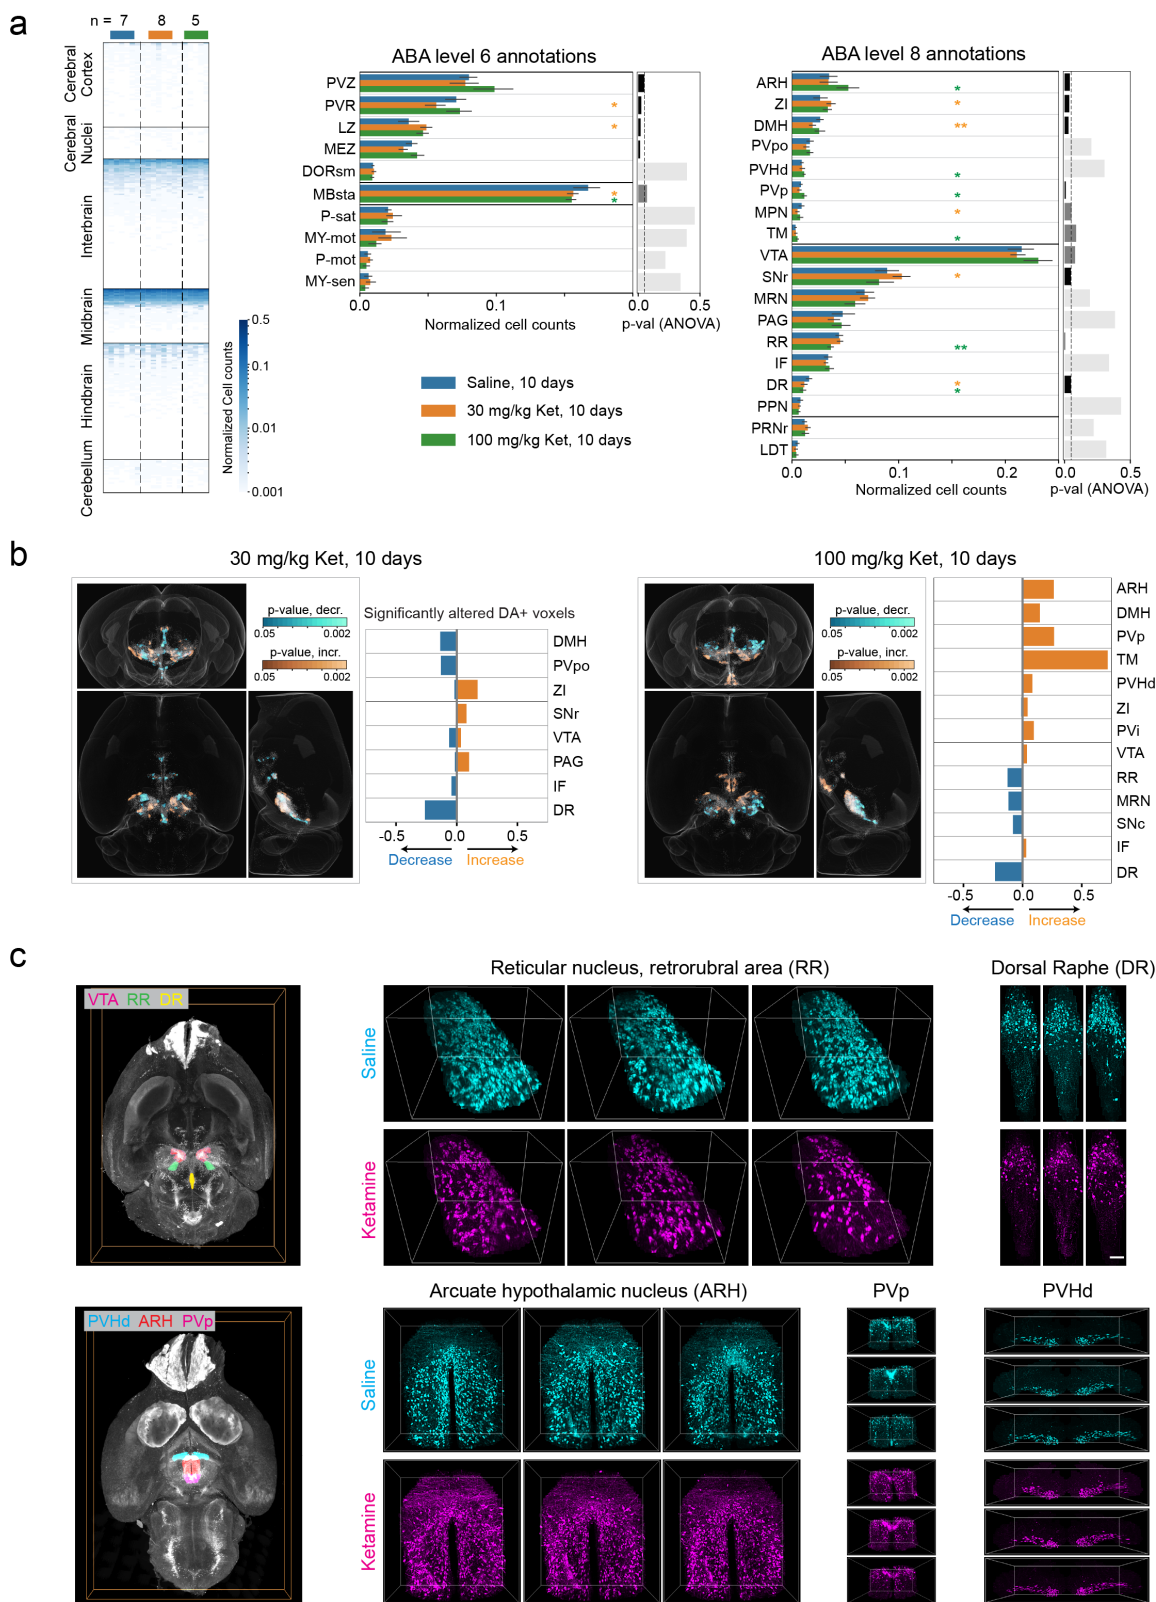

283

284 **Figure 3. Repeated ketamine exposure results in divergent brain-wide changes in the**  
 285 **dopaminergic modulatory system. (a) Brain-wide heatmap of the TH+ cell counts in ABA ROIs**

286 after 10 days ketamine (30 mg/kg and 100 mg/kg) and saline (Sal) i.p. injections. Independent  
287 biological replicates of n=7 for Sal, 8 for 30 mg/kg ketamine and 5 for 100 mg/kg ketamine treated  
288 groups. The regional TH<sup>+</sup> neuron counts were normalized by respective total number of TH<sup>+</sup>  
289 neurons in brain. Orange, green, and blue bars quantify TH<sup>+</sup> cells in 30 mg/kg ketamine, 100  
290 mg/kg ketamine and saline-treated brains, respectively. Two-sided Mann-Whitney U tests with  
291 Bonferroni Correction were performed to calculate the statistical significance. \* and \*\* indicate p-  
292 values < 0.05 and < 0.01, respectively. ANOVA tests p-values are plotted as bar plots on the right.  
293 (b) Whole brain orthogonal projections visualizing voxel-by-voxel differences in TH<sup>+</sup> neuron  
294 densities after 10 days of 30mg/kg ketamine (n=8) and 100mg/kg ketamine (n=5), compared with  
295 saline (n=7) controls. Cyan and Orange visualize p-values (two-sided Mann-Whitney U test) for  
296 decreases and increases, respectively. Note that the decreases and increases in the densities are  
297 identified by comparing the sample averages of the treated and control groups. The bar plots  
298 quantify the fraction of DA neurons containing voxels (within an ABA ROI) that show significant  
299 alterations. (c) Representative volume renderings from 3 different brain samples, each for  
300 ketamine (100 mg/kg, 10 days) and saline samples, showing decreases in RR (Reticular nucleus,  
301 retrorubral area) and DR (Dorsal raphe), and increases in ARH (Arcuate hypothalamic nucleus),  
302 PVp (Periventricular hypothalamic nucleus, posterior part) and PVHd (Periventricular  
303 hypothalamic nucleus, descending division). Renderings on the left visualize the spatial locations  
304 of these regions in the brain.



a

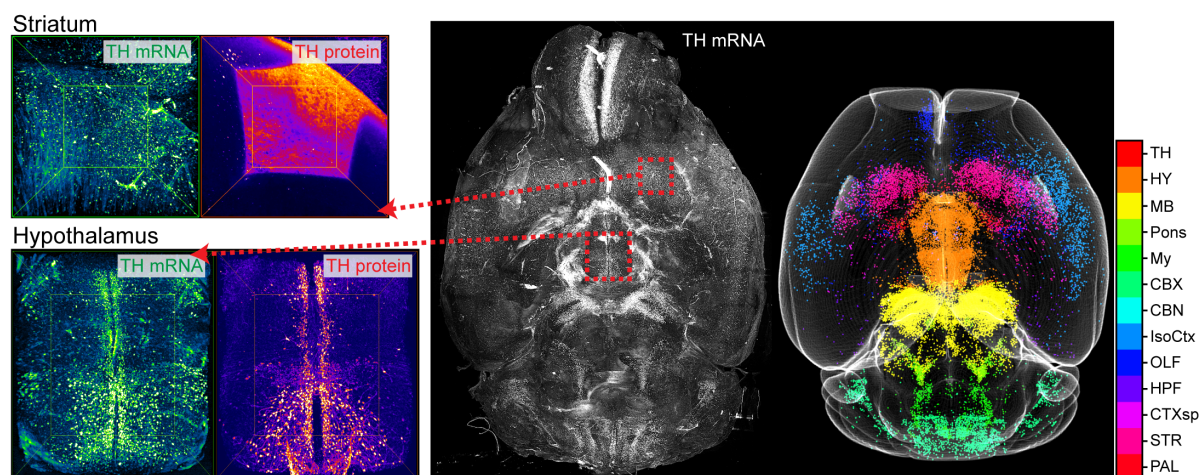

b

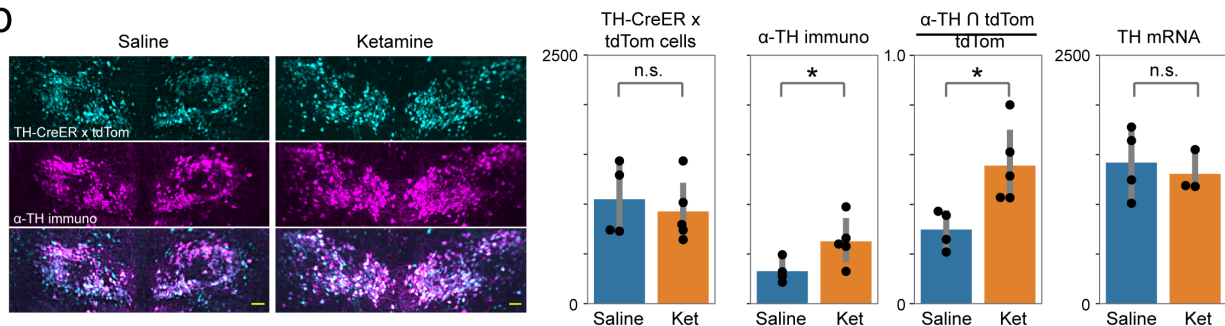

c

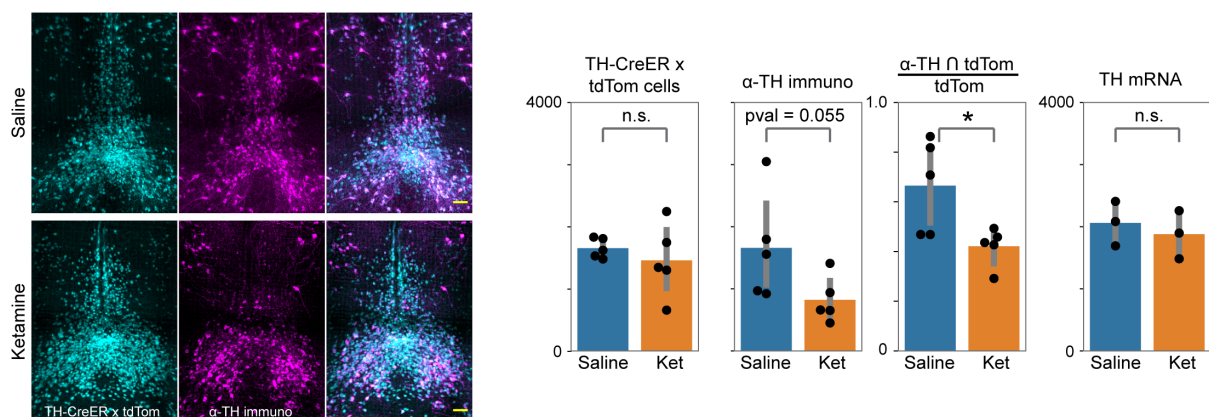

305

306 **Figure 4. Untranslated TH mRNA+ neurons facilitate adaptations in the dopamine system.**

307 (a) Whole brain mapping of TH mRNA, showing much broader expression than the TH protein.

308 Color code corresponds to different ABA ROIs, as listed in adjoining color bar. (b-c) Co-labeling

309 of TH-CreER x tdTomato signal induced with 4-OHT injections one week before the start of

310 ketamine i.p. injections and  $\alpha$ -TH immunostaining signal capturing TH protein expression post-

311 treatment (10 days). Left to right, bar plots compare the number of tdTomato+ neurons,  $\alpha$ -TH

312 immunostained neurons, their intersection and the number of TH mRNA<sup>+</sup> neurons. (b) and (c)  
313 show field-of-views that include paraventricular hypothalamic nucleus and dorsal raphe regions,  
314 respectively. Two-sided Mann-Whitney U tests were performed for statistical significance  
315 calculations. \* indicates <0.05 p-value. All scale bars are 100 μm. Also see **Supplementary**  
316 **Videos 4 and 5** for whole brain volumetric renderings.

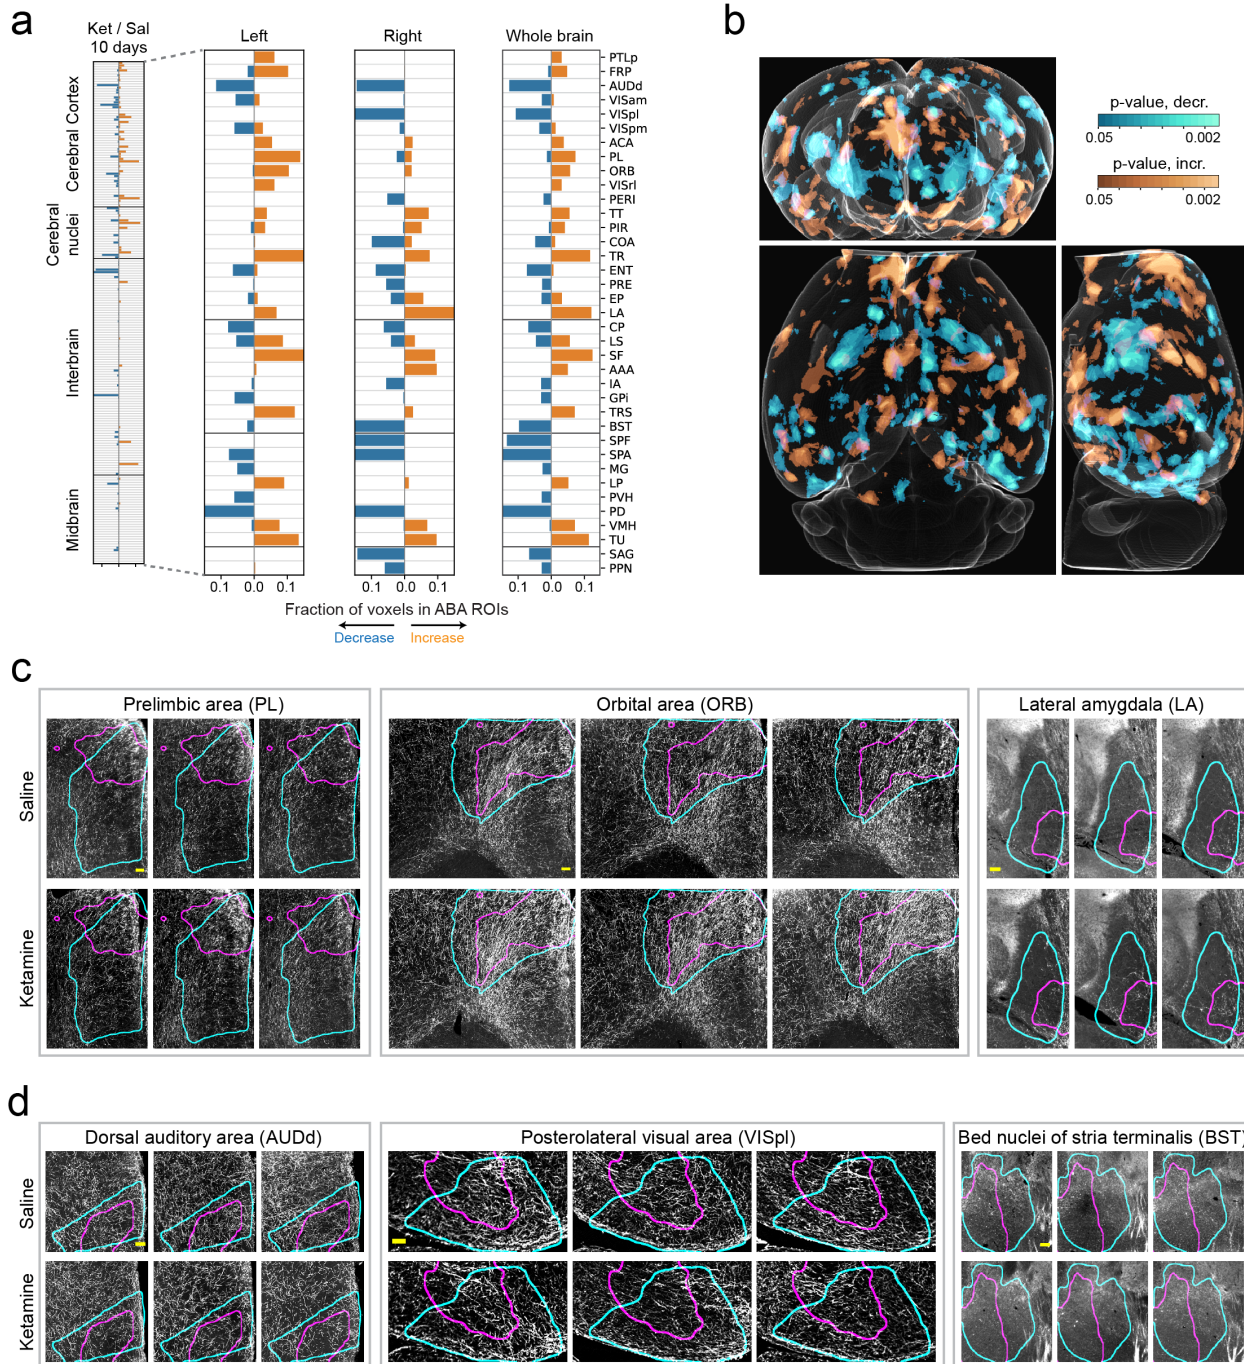

317

318 **Figure 5. Brain-wide changes in TH+ neuronal projections after chronic ketamine exposure.**

319 (a) Stacked barplots of fractions of ABA ROI voxels with significantly increased (orange) and

320 decreased (blue) TH+ neuronal projection densities after 10 days of ketamine exposure.

321 Independent biological replicates as follows: n (Ket, 10d) = 5, n (Sal, 10d) = 7. (b) Whole brain

322 orthogonal projections visualizing voxel-by-voxel differences (independent of ABA) in TH+

323 neuronal projection densities. Orange and Cyan represent significant increases and decreases,

324 respectively. (c-d) Representative examples of ABA ROIs showing increases (c) and decreases (d)  
325 in TH+ neuronal projections. Cyan and Magenta curves outline the ABA ROIs and areas with  
326 significantly changed projection densities. Images shown are representative single optical planes.  
327 Also see **Supplementary Video 6** for rendering of heatmaps, **Supplementary Videos 7-12** for  
328 complete volumes. All scale bars are 100  $\mu\text{m}$ .



## 329 **Methods**

330 **Animals.** Male TH-2a-CreER<sup>32</sup> mice were acquired from Dr. David Ginty's lab and were bred  
331 with B6;129S6-*Gt(ROSA)26Sor<sup>tm14(CAG-tdTomato)Hze/J</sup>* (Ai14; JAX Strain #:007908). All mice were  
332 group-housed in a 12:12 light:dark cycle at 22°C. Food and water were provided *ad libitum*. (*R,S*)-  
333 ketamine i.p. injections were performed during the light phase. All experimental procedures were  
334 approved by the IACUC at Columbia University. Locomotor activity was recorded after 1, 5, and  
335 10 days of treatment. The mice were placed within a novel home cage and were recorded (camera:  
336 GoHZQ, 1920 x 1080 pixels, 30 fps transmission rate) 15 minutes and 1 hour post- intraperitoneal  
337 ketamine injections. The total distance traveled was quantified using the ANY-maze tracking  
338 software (ANY-maze, RRID:SCR\_014289, Stoelting, Wood Dale, IL, United States).

339 **Drugs.** 4-hydroxytamoxifen (4-OHT; Sigma, H7904) was dissolved in corn oil/ethanol (90% corn  
340 oil, 10% ethanol) via the use of a vortex, ultrasonication, and 55°C heating for <15 min. Mice were  
341 intraperitoneally injected with 2 mg of 4-OHT. (*R,S*)-ketamine (Covetrus) was used for all  
342 ketamine exposure experiments. 3 and 10 mg/mL stocks were prepared in saline (0.9% NaCl)<sup>45</sup>.  
343 One dose of 30 mg/kg or 100 mg/kg of (*R,S*)-ketamine was intraperitoneally injected in a 24 hour  
344 period for 1 day, 5 days, or 10 days treated animals. 8-10 weeks old mice were used for all  
345 experiments.

346 **Whole brain clearing and labelling.** For iDISCO clearing, the iDISCO+ protocol was followed  
347 as previously described<sup>33</sup>. The brains were pre-treated with methanol, placed in 66%  
348 dichloromethane/ 33% methanol overnight, bleached with 5% H<sub>2</sub>O<sub>2</sub>/methanol, and then  
349 rehydrated. Afterwards, the whole brains were permeabilized for 2 days at 37°C in 1x phosphate  
350 buffered saline (PBS), 0.2% Triton X-100, 0.3 M glycine, and 20% dimethyl sulfoxide (DMSO).  
351 The brains were blocked with 1xPBS, 0.2% Triton X-100, 10% DMSO, 6% donkey serum for 2  
352 days at 37°C, followed by incubation in 1xPBS, 0.1% Triton X-100, 3% donkey serum, and a  
353 1:200-1:500 dilution of the primary antibody sheep  $\alpha$ -TH (ab113, Abcam) for 10 days. After  
354 washing in 1xPBS/0.1% Triton X-100, the brains were placed in the secondary antibody solution  
355 containing 1xPBS/0.1% Triton X-100/3% donkey serum and a 1:1000 dilution of donkey anti-  
356 sheep 647 (A-21448, Thermofisher) for 10 days.

357 We used the passive CLARITY method as detailed previously<sup>34</sup>. The tissue was first  
358 encapsulated in a hydrogel monomer (HM) solution consisting of 1% (wt/vol) acrylamide, 0.05%

359 (wt/vol) bisacrylamide, 4% paraformaldehyde, 1x phosphate buffered saline (1xPBS), deionized  
360 water, and 0.25% of thermal initiator (VA-044, Fisher Scientific), followed by clearing with SBC  
361 buffer (4% (wt/vol) SDS, 0.2 M boric acid, pH 8.5 and deionized water) at 37°C with shaking. The  
362 SBC buffer was replaced every 2 days. After clearing, the SBC buffer was washed off with 0.2 M  
363 boric acid pH 8.5 with 0.1% Triton X-100. The cleared tissue was immunostained in 0.2 M boric  
364 acid pH 7.5 with 0.1% Triton X-100. The final refractive index matching was performed in  
365 RapiClear (SunJin lab, RI=1.47).

366 For HCR-FISH, we used split-initiator DNA probes (IDT) for detecting the tyrosine  
367 hydroxylase (Th, NM\_012740.3) mRNA. During probe hybridization/detection, the brains  
368 underwent 1) equilibration with 5xSSCTw buffer, 2) acetylation with 0.25% acetic anhydride  
369 solution, 3) equilibration with probe hybridization buffer (30% formamide, 5xSSC, 0.5 mg/mL  
370 yeast tRNA, 10% dextran sulfate), and 4) probe incubation (50 nM) in probe hybridization buffer  
371 at 37°C. The time/amount of solution varied depending on the thickness of the brain slices. The  
372 slices were then washed in probe wash buffer (30% formamide, 5X SSC, 9 mM citric acid, and  
373 0.1% tween 20) at 37°C as well as two rounds of washes in 5xSSCTw. Afterwards, the slices were  
374 equilibrated in amplification buffer (5xSSC, 10% dextran sulfate, and 0.1% Tween-20), and then  
375 incubated in amplification buffer with 50-150 nM of hairpins H1 and H2 conjugated with AF-647  
376 (Molecular Instruments). The hairpin/amplification buffer mixture was then washed off with  
377 several rounds of 5xSSCTw.

378 For activated caspase staining, the TH-2a-CreER;Ai14 brains were sliced with a vibratome  
379 (Leica VT1000 S Vibrating blade microtome) into 50  $\mu$ m sections. These sections were placed in  
380 a blocking buffer (1xPBS/0.1% bovine serum albumin/0.1% Triton X-100) for 30 minutes and  
381 then incubated in a 1:200-1:400 dilution of the primary antibody, rabbit anti-active caspase-3 (BD  
382 Biosciences, catalog no. 559565), with 1xPBS/0.5% bovine serum albumin /0.1% Triton X-100  
383 overnight. After washing in 1xPBS/0.1% Triton X-100, the sections were incubated, for two hours,  
384 in a 1:500 dilution of the secondary antibody, goat anti-rabbit 647 (ThermoFisher, Catalog #A-  
385 21245) with 1xPBS/0.5% bovine serum albumin /0.1% Triton X-100. The secondary antibody was  
386 washed off in 1xPBS/0.1% Triton X-100, and the slices were incubated in a 1:1000 dilution of a 1  
387 mg/mL stock of DAPI with 1xPBS for 15 minutes. After washing off with 1xPBS/0.1% Triton X-  
388 100, the slices were mounted in 65% glycerol.

389 **Imaging.** All imaging experiments were performed with CLARITY-optimized light sheet  
390 microscopy (COLM)<sup>34</sup> or ClearScope (MBF Biosciences)<sup>35</sup> Olympus 10x/0.6NA/8 mmWD or  
391 ASI 16x/12mmWD detection objectives were used for most of the whole brain imaging with  
392 COLM. Olympus Macro 4x/0.28NA or Nikon 20x/1.0NA were used for ClearScope imaging.

393 **suiteWB: Image Registration.** We first developed a fast and efficient multistep multiresolution  
394 3D image registration tool by using Mutual Information<sup>46</sup> as the similarity metric. The registration  
395 starts by rigid transformation (with 6 degrees of freedom for rotation and translation) of the moving  
396 image (i.e. the image being aligned) to roughly align with the reference image. Next, the moving  
397 image is affine transformed (12 degrees of freedom) to account for shearing and shrinking artifacts  
398 introduced by labeling, tissue clearing and imaging. Finally, we used a uniform grid of control  
399 points and third-order B-splines are used for non-rigid local transformations. Affine and nonrigid  
400 steps were done at three different resolutions. The algorithms were implemented with ITKv4<sup>47</sup>  
401 registration framework. All  $\alpha$ -TH stained whole brain images were registered at 10  $\mu$ m resolution  
402 to a local average reference brain (generated from 7  $\alpha$ -TH whole brain images), and the resulting  
403 spatial transformation parameters were applied to high-resolution datasets. ABA annotations were  
404 registered one time to the local average reference brain.

405 **suiteWB: Multi-model segmentation pipeline.** Segmentation of whole brain images presents  
406 unique challenges of high spatial variations in signal-noise ratios (SNR), object densities and  
407 varied image artifacts. Multiple open-source tools exist for cell segmentation<sup>48-50</sup>, however, some  
408 of them are optimized for confocal images with smaller data sizes, others utilize deep learning  
409 models with pre-trained parameters that do not accurately generalize to images with different  
410 signal quality distribution and also require dense annotation training datasets. We chose to develop  
411 a semi-supervised multi-model learning approach to address the challenges of whole brain  
412 segmentation. This approach does not require dense annotated training and also allows the  
413 flexibility of using different optimal parameter sets for different regions (i.e. with dense or sparse  
414 object densities). We utilized open-source toolkit ilastik<sup>51</sup> for semi-supervised learning of  
415 classifiers based on image features.

416 The high-resolution registered whole brain images were split into densely and sparsely  
417 populated regions by visual inspection, followed by pixel classification to generate probability  
418 maps. For the sparse region, a standard pixel classification workflow in ilastik was applied to

419 generate cell probability maps. First, image features were extracted by using multiple types of  
420 filters with different kernel sizes, including intensity filters (Gaussian Smoothing), edge detection  
421 filters (Laplacian of Gaussian, Gaussian Gradient Magnitude, Difference of Gaussians), and  
422 texture detection filters (Structure Tensor Eigenvalues, Hessian of Gaussian Eigenvalues). The  
423 image features were then used to estimate the probabilities of pixels belonging to a cell or  
424 background. For denser regions, we utilized the Autocontext workflow in ilastik. In the first step,  
425 the image pixels were classified into five categories: empty space, brain background, fibers  
426 (neuronal projections), cell cytoplasm and cell nucleus. In the second step, the classification results  
427 were combined with image features (with filters described above for sparse regions) to generate  
428 probability maps of cells against background. Next, we applied blob detection on the dense and  
429 sparse probability maps separately to detect cells. This was achieved by using the difference of  
430 Gaussian (DOG) algorithm (Python scikit-image package<sup>52</sup>. To optimize memory usage, images  
431 were processed block-wise with carefully resolved boundary conditions. Cells detected in dense  
432 and sparse regions were merged and were further tuned by using Napari viewer. F1 for sparse and  
433 dense region segmentations reached 0.95 and 0.86, with precision 0.889 and 0.976 respectively,  
434 compared to human-annotated datasets (**Fig. 2**). For comparison, ClearMap<sup>48</sup>, applied to  
435 immediate early gene datasets, reported a precision of 0.83 and 0.75 compared to two human  
436 annotators.

437 For colocalization analysis of the multi-channel (i.e. tdTomato and  $\alpha$ -TH immunostaining  
438 signal) CLARITY images, cell detection (as described above) was applied separately to different  
439 channels. The full cell body labels were generated by taking the union of the detected cells in the  
440 two channels that were less than 25 $\mu$ m apart. The cell identities (i.e. if expressing tdTomato or  $\alpha$ -  
441 TH or both) were assigned by manually validated thresholding of probability maps of each  
442 channel.

443 Neuronal projection segmentation was performed by semi-supervised pixel classification  
444 by using image features (as discussed above) to generate the probability maps distinguishing  
445 projections and background. The probability threshold for binarization was determined by careful  
446 inspection throughout various regions of the brain. The binarized data was then convolved with  
447 3D Gaussian kernels of 200  $\mu$ m and 500  $\mu$ m. The ratio of the two gaussians resulted in locally  
448 normalized neuronal projection densities.

449            Statistical comparisons between Ketamine and Saline treated samples were done with two-  
450 sided Mann Whitney U test (using Python package Scipy<sup>53</sup>) on normalized cell counts (cell count  
451 in a region divided by total cell count of that whole brain) and cell densities (estimated by 3D  
452 Gaussian kernel of size 50  $\mu\text{m}$  in each dimension).

## 453 **References**

- 454 1. Bell, R. F. & Kalso, E. A. Ketamine for pain management. *Pain Rep* **3**, e674 (2018).
- 455 2. Berman, R. M. *et al.* Antidepressant effects of ketamine in depressed patients. *Biological*  
456 *Psychiatry* **47**, 351–354 (2000).
- 457 3. Ibrahim, L. *et al.* Course of Improvement in Depressive Symptoms to a Single Intravenous  
458 Infusion of Ketamine vs Add-on Riluzole: Results from a 4-Week, Double-Blind, Placebo-Controlled  
459 Study. *Neuropsychopharmacol* **37**, 1526–1533 (2012).
- 460 4. Zarate, C. A. *et al.* A randomized trial of an N-methyl-D-aspartate antagonist in treatment-  
461 resistant major depression. *Arch Gen Psychiatry* **63**, 856–864 (2006).
- 462 5. Daly, E. J. *et al.* Efficacy and Safety of Intranasal Esketamine Adjunctive to Oral Antidepressant  
463 Therapy in Treatment-Resistant Depression: A Randomized Clinical Trial. *JAMA Psychiatry* **75**, 139–148  
464 (2018).
- 465 6. Zanos, P. *et al.* NMDAR inhibition-independent antidepressant actions of ketamine metabolites.  
466 *Nature* **533**, 481–486 (2016).
- 467 7. Zanos, P. *et al.* Ketamine and Ketamine Metabolite Pharmacology: Insights into Therapeutic  
468 Mechanisms. *Pharmacol Rev* **70**, 621–660 (2018).
- 469 8. Olney, J. W., Newcomer, J. W. & Farber, N. B. NMDA receptor hypofunction model of  
470 schizophrenia. *Journal of Psychiatric Research* **33**, 523–533 (1999).
- 471 9. Franks, N. P. & Lieb, W. R. Molecular and cellular mechanisms of general anaesthesia. *Nature*  
472 **367**, 607–614 (1994).
- 473 10. Chen, X., Shu, S. & Bayliss, D. A. HCN1 Channel Subunits Are a Molecular Substrate for Hypnotic  
474 Actions of Ketamine. *J. Neurosci.* **29**, 600–609 (2009).
- 475 11. Zhou, C. *et al.* Forebrain HCN1 channels contribute to hypnotic actions of ketamine.  
476 *Anesthesiology* **118**, 785–795 (2013).
- 477 12. Sleight, J., Harvey, M., Voss, L. & Denny, B. Ketamine – More mechanisms of action than just  
478 NMDA blockade. *Trends in Anaesthesia and Critical Care* **4**, 76–81 (2014).
- 479 13. Gupta, A., Devi, L. A. & Gomes, I. Potentiation of  $\mu$ -opioid receptor-mediated signaling by  
480 ketamine. *Journal of Neurochemistry* **119**, 294–302 (2011).
- 481 14. Moda-Sava, R. N. *et al.* Sustained rescue of prefrontal circuit dysfunction by antidepressant-  
482 induced spine formation. *Science* **364**, eaat8078 (2019).
- 483 15. Cichon, J. *et al.* Ketamine triggers a switch in excitatory neuronal activity across neocortex. *Nat*  
484 *Neurosci* (2022) doi:10.1038/s41593-022-01203-5.
- 485 16. Kokkinou, M., Ashok, A. H. & Howes, O. D. The effects of ketamine on dopaminergic function:  
486 meta-analysis and review of the implications for neuropsychiatric disorders. *Mol Psychiatry* **23**, 59–69  
487 (2018).

- 488 17. Simmler, L. D. *et al.* Dual action of ketamine confines addiction liability. *Nature* 1–6 (2022)  
489 doi:10.1038/s41586-022-04993-7.
- 490 18. Iro, C. M., Hamati, R., El Mansari, M. & Blier, P. Repeated but Not Single Administration of  
491 Ketamine Prolongs Increases of the Firing Activity of Norepinephrine and Dopamine Neurons. *Int J*  
492 *Neuropsychopharmacol* **24**, 570–579 (2021).
- 493 19. Smith-Apeldoorn, S. Y., Veraart, J. K., Spijker, J., Kamphuis, J. & Schoevers, R. A. Maintenance  
494 ketamine treatment for depression: a systematic review of efficacy, safety, and tolerability. *The Lancet*  
495 *Psychiatry* **9**, 907–921 (2022).
- 496 20. Short, B., Fong, J., Galvez, V., Shelker, W. & Loo, C. K. Side-effects associated with ketamine use  
497 in depression: a systematic review. *The Lancet Psychiatry* **5**, 65–78 (2018).
- 498 21. Morgan, C. J. A., Curran, H. V. & Drugs (ISCD), the I. S. C. on. Ketamine use: a review. *Addiction*  
499 **107**, 27–38 (2012).
- 500 22. Ke, X. *et al.* The profile of cognitive impairments in chronic ketamine users. *Psychiatry Research*  
501 **266**, 124–131 (2018).
- 502 23. Zhang, C., Xu, Y., Zhang, B., Hao, W. & Tang, W. K. Cognitive impairment in chronic ketamine  
503 abusers. *Psychiatry Research* **291**, 113206 (2020).
- 504 24. Strous, J. F. M. *et al.* Brain Changes Associated With Long-Term Ketamine Abuse, A Systematic  
505 Review. *Front. Neuroanat.* **16**, 795231 (2022).
- 506 25. Behrens, M. M. *et al.* Ketamine-Induced Loss of Phenotype of Fast-Spiking Interneurons Is  
507 Mediated by NADPH-Oxidase. *Science* **318**, 1645–1647 (2007).
- 508 26. Hamm, J. P., Peterka, D. S., Gogos, J. A. & Yuste, R. Altered Cortical Ensembles in Mouse Models  
509 of Schizophrenia. *Neuron* **94**, 153-167.e8 (2017).
- 510 27. Garritsen, O., van Battum, E. Y., Grossouw, L. M. & Pasterkamp, R. J. Development, wiring and  
511 function of dopamine neuron subtypes. *Nat Rev Neurosci* 1–19 (2023) doi:10.1038/s41583-022-00669-3.
- 512 28. Hussain, L. S., Reddy, V. & Maani, C. V. Physiology, Noradrenergic Synapse. in *StatPearls*  
513 (StatPearls Publishing, 2023).
- 514 29. Robertson, S. D., Plummer, N. W., de Marchena, J. & Jensen, P. Developmental origins of central  
515 norepinephrine neuron diversity. *Nat Neurosci* **16**, 1016–1023 (2013).
- 516 30. Dirks, R. M. & Pierce, N. A. Triggered amplification by hybridization chain reaction. *Proceedings*  
517 *of the National Academy of Sciences* **101**, 15275–15278 (2004).
- 518 31. Kumar, V. *et al.* Optimization and evaluation of fluorescence in situ hybridization chain reaction  
519 in cleared fresh-frozen brain tissues. *Brain Struct Funct* **226**, 481–499 (2021).
- 520 32. Abaira, V. E. *et al.* The Cellular and Synaptic Architecture of the Mechanosensory Dorsal Horn.  
521 *Cell* **168**, 295-310.e19 (2017).



- 522 33. Renier, N. *et al.* iDISCO: a simple, rapid method to immunolabel large tissue samples for volume  
523 imaging. *Cell* **159**, 896–910 (2014).
- 524 34. Tomer, R., Ye, L., Hsueh, B. & Deisseroth, K. Advanced CLARITY for rapid and high-resolution  
525 imaging of intact tissues. *Nature Protocols* **9**, 1682–1697 (2014).
- 526 35. Migliori, B. *et al.* Light sheet theta microscopy for rapid high-resolution imaging of large  
527 biological samples. *BMC Biology* **16**, 57 (2018).
- 528 36. Wang, Q. *et al.* The Allen Mouse Brain Common Coordinate Framework: A 3D Reference Atlas.  
529 *Cell* **181**, 936–953.e20 (2020).
- 530 37. Matthews, G. A. *et al.* Dorsal Raphe Dopamine Neurons Represent the Experience of Social  
531 Isolation. *Cell* **164**, 617–631 (2016).
- 532 38. Moriya, S. *et al.* Involvement of A13 dopaminergic neurons located in the zona incerta in  
533 nociceptive processing: a fiber photometry study. *Molecular Brain* **13**, 60 (2020).
- 534 39. Moaddab, M. & McDannald, M. A. Retrosubthalamic field is a hub for diverse threat and aversive  
535 outcome signals. *Current Biology* **31**, 2099–2110.e5 (2021).
- 536 40. Zhang, X. & van den Pol, A. N. Hypothalamic arcuate nucleus tyrosine hydroxylase neurons play  
537 orexigenic role in energy homeostasis. *Nat Neurosci* **19**, 1341–1347 (2016).
- 538 41. Dominguez, J. M. & Hull, E. M. Dopamine, the medial preoptic area, and male sexual behavior.  
539 *Physiology & Behavior* **86**, 356–368 (2005).
- 540 42. Dulcis, D., Jamshidi, P., Leutgeb, S. & Spitzer, N. C. Neurotransmitter Switching in the Adult Brain  
541 Regulates Behavior. *Science* **340**, 449–453 (2013).
- 542 43. Ozdas, M. S. *et al.* Non-invasive molecularly-specific millimeter-resolution manipulation of brain  
543 circuits by ultrasound-mediated aggregation and uncaging of drug carriers. *Nat Commun* **11**, 4929  
544 (2020).
- 545 44. Pouliopoulos, A. N. *et al.* A Clinical System for Non-invasive Blood–Brain Barrier Opening Using a  
546 Neuronavigation-Guided Single-Element Focused Ultrasound Transducer. *Ultrasound in Medicine and*  
547 *Biology* **46**, 73–89 (2020).
- 548 45. Brachman, R. A. *et al.* Ketamine as a prophylactic against stress-induced depressive-like  
549 behavior. *Biol Psychiatry* **79**, 776–786 (2016).
- 550 46. Viola, P. & Wells III, W. M. Alignment by Maximization of Mutual Information. *International*  
551 *Journal of Computer Vision* **24**, 137–154 (1997).
- 552 47. McCormick, M., Liu, X., Jomier, J., Marion, C. & Ibanez, L. ITK: enabling reproducible research  
553 and open science. *Front Neuroinform* **8**, 13 (2014).
- 554 48. Renier, N. *et al.* Mapping of Brain Activity by Automated Volume Analysis of Immediate Early  
555 Genes. *Cell* **165**, 1789–1802 (2016).



- 556 49. Tyson, A. L. *et al.* A deep learning algorithm for 3D cell detection in whole mouse brain image  
557 datasets. *PLOS Computational Biology* **17**, e1009074 (2021).
- 558 50. Stringer, C., Wang, T., Michaelos, M. & Pachitariu, M. Cellpose: a generalist algorithm for cellular  
559 segmentation. *Nat Methods* **18**, 100–106 (2021).
- 560 51. Berg, S. *et al.* ilastik: interactive machine learning for (bio)image analysis. *Nat Methods* **16**,  
561 1226–1232 (2019).
- 562 52. Walt, S. van der *et al.* scikit-image: image processing in Python. *PeerJ* **2**, e453 (2014).
- 563 53. Virtanen, P. *et al.* SciPy 1.0: fundamental algorithms for scientific computing in Python. *Nat*  
564 *Methods* **17**, 261–272 (2020).
- 565
- 566
